# Supplementary material for: Beyond an Infant Sleep Aid: Reclaiming infant carrying practices to support Indigenous infant and maternal health
Source: Research Square preprint supplement (doi:10.21203/rs.3.rs-7264319/v1), 2025-08-28
Supplement: Supplementary file 1 [file 28748028ec53babb9c1ee183.docx]

Appendix A

| **CRADLEBOARDS** | | | |
| --- | --- | --- | --- |
| 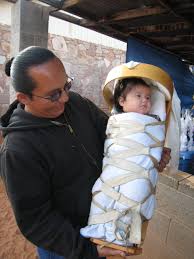  There are many reasons why a caregiver might want to use a cradleboard. Among participant responses’ about whether or not they used cradleboards with their children, participants’ mentioned that cradleboards played a role in calming the baby, giving their baby a sense of security (also known as attachment), and supporting their baby’s healthy development. Participants’ also brought up the traditional role that cradleboards have played in their families. | | | |
| **Attachment** | **Calming** | **Cradleboards aids infants’ development** | **Tradition** |
| *Attachment* refers to the process of a caregiver responding to, and meeting a baby’s needs, such that the baby’s sense of security with their caregiver is established. | *Calming* refers to when caregivers’ used the cradleboard to sooth or provide comfort to the baby. | *Cradleboards aid infants’ development* refers to a caregivers’ belief that using a cradleboard contributes to the baby’s healthy growth. | *Tradition* refers to the use of the cradleboard across generations in a family. |
| “I felt that [the cradleboard] had helped when my daughter would fight herself. My mom had told me that when you put your child in the cradleboard it gives them a sense of security because they are bundled up tight in blankets like they’re being held.” | “[The cradleboard was used] when she was younger, any time she would get fussy or tired.”  “The cradleboard had also provided help when the kids were being fussy. When they are wrapped in the board, they instantly fall asleep.” | “We used the cradleboard for all of our kids. It had helped the kids to gain a posture and can hold their head high ... I didn’t like western baby carriers because the baby would be dangling in an odd position.” | “Yes, I had used a cradleboard for all of my children. Traditionally, for Navajos you are supposed to use a cradleboard. There is a story behind the cradleboard.”  “I had used a cradleboard for my daughter. It was the cradleboard that I had used when I was a baby.” |
